# Supplementary material
Source: PubMed Central journal article supplement (PMC5741431)
Supplement: supp_5.4.E746_2017-0007-1-at.pdf [file supp_5.4.E746_2017-0007-1-at.pdf]

### Appendix 1 (as supplied by the authors) : Information on Provincial Economic Zones

Provincial economic zones (EZs) were created through a government initiative in the mid-1990s and were managed by Regional Economic Development Boards providing institutional structure for regional economic development in the province. Table A1 below presents population by EZ.

Table A1: Population by Provincial Economic Zone, Newfoundland and Labrador, 2006

| Economic Zone | Population |
|---------------|------------|
| 1             | 3,120      |
| 2             | 9,660      |
| 3             | 9,176      |
| 4             | 2,591      |
| 5             | 1,817      |
| 6             | 8,833      |
| 7             | 9,251      |
| 8             | 40,805     |
| 9             | 21,807     |
| 10            | 9,120      |
| 11            | 14,264     |
| 12            | 26,431     |
| 13            | 7,927      |
| 14            | 47,243     |
| 15            | 28,060     |
| 16            | 21,585     |
| 17            | 39,982     |
| 18            | 7,869      |
| 19            | 187,508    |
| 20            | 8,420      |
| Province      | 505,469    |

Source: Statistics Canada Census, 2006
