# Supplementary material
Source: PubMed Central journal article supplement (PMC5741431)
Supplement: supp_5.4.E746_2017-0007-2-at.pdf [file supp_5.4.E746_2017-0007-2-at.pdf]

**Appendix 2 (as supplied by the authors): ICD Codes for Ambulatory-care-sensitive Conditions**

| <b>Classification of Conditions</b> | <b>Condition</b>                  | <b>ICD-9 AND ICD-10-Codes</b>                                                                                                                                                                                                                                                                                                                                                                                                                                                                                                                                                         |
|-------------------------------------|-----------------------------------|---------------------------------------------------------------------------------------------------------------------------------------------------------------------------------------------------------------------------------------------------------------------------------------------------------------------------------------------------------------------------------------------------------------------------------------------------------------------------------------------------------------------------------------------------------------------------------------|
| <i>Chronic Conditions</i>           | Asthma                            | <b>ICD-9 493</b><br><b>ICD-10-CA J45</b>                                                                                                                                                                                                                                                                                                                                                                                                                                                                                                                                              |
|                                     | Angina                            | <b>ICD-9 411, 413</b><br><b>ICD-10-CA I20, I23.82, I24.0, I24.8, I24.9</b><br>Excluding cases with the following surgical procedures**:<br>CCP 01.01-01.39, 07.24, 14.01-14.83, 14.88-16.82, 16.89-21.82, 21.89-29.7, 29.82-34.81, 34.89-41.81, 41.83-43.82, 43.84-45.84, 45.88-46.88, 46.90-48.91, 48.99-50.79, 50.91-50.93, 50.96-52.81, 52.89-63.95, 63.97-64.96, 64.98-66.83, 66.89-67.84, 67.89-69.82, 69.89-71.96, 71.98-72.95, 72.97-75.81, 75.89-80.83, 80.89-88.81, 88.89-92.69, 92.80-97.82, or 97.89-98.99 CCI 1.^, 2.^, 5.^ (i.e. any procedure from CCI section 1, 2, 5) |
|                                     | Heart Failure and pulmonary edema | <b>ICD-9 428, 518.4</b><br><b>ICD-10-CA I50, J81, I11.0</b><br>Excluding cases with the following surgical procedures**:<br>CCP 48.1, 49.5, 48.02, 48.03, 49.71, 49.72, 49.73, 49.82, 49.86<br>CCI 1.IJ.50, 1.IJ.57.GQ, 1.HZ.85, 1.IJ.76, 1.HB.53, 1.HD.53, 1.HZ.53, 1.HB.55, 1.HD.55, 1.HZ.55, 1.HB.54, 1.HD.54                                                                                                                                                                                                                                                                      |
|                                     | Convulsion & Epilepsy             | <b>ICD-9 345, 780.3, 642.6</b><br><b>ICD-10-CA G40, G41, R56, O15</b>                                                                                                                                                                                                                                                                                                                                                                                                                                                                                                                 |
|                                     | Diabetes with complications       | <b>ICD-9 250.0, 250.1, 250.2, 250.3, 250.4, 250.5, 250.6, 250.7, 250.8, 250.9</b><br><b>ICD-10-CA E10.1, E10.6, E10.7, E10.9, E11.0, E11.1, E11.6, E11.7, E11.9, E13.0, E13.1, E13.6, E13.7, E13.9, E14.0, E14.1, E14.6, E14.7, E14.9</b>                                                                                                                                                                                                                                                                                                                                             |
|                                     | Hypertension                      | <b>ICD-9 401.0, 401.9, 402.0, 402.1, 402.9</b><br><b>ICD-10-CA I10.0, I10.1, I11</b><br>Excluding cases with the following surgical procedures**:<br>CCP 48.1, 49.5, 48.02, 48.03, 49.71, 49.72, 49.73, 49.82, 49.86<br>CCI 1.IJ.50, 1.IJ.57.GQ, 1.HZ.85, 1.IJ.76, 1.HB.53<br>1.HD.53, 1.HZ.53, 1.HB.55, 1.HD.55, 1.HZ.55,                                                                                                                                                                                                                                                            |
|                                     | COPD                              | <b>ICD-9 491, 492, 494, 496</b><br><b>ICD-10-CA J41, J42, J43, J44, J47</b>                                                                                                                                                                                                                                                                                                                                                                                                                                                                                                           |
|                                     | Pneumonia                         | <b>Pneumonia (only when a secondary diagnosis of COPD is present)</b><br><b>ICD-9 480, 481, 482, 483, 484, 485, 486</b><br><b>ICD-10-CA J12, J13, J14, J15, J16, J18</b>                                                                                                                                                                                                                                                                                                                                                                                                              |
|                                     | Bronchitis                        | <b>Acute Bronchitis (only when a secondary diagnosis of COPD is present)</b><br><b>ICD-9 466.0</b><br><b>ICD-10-CA J20</b>                                                                                                                                                                                                                                                                                                                                                                                                                                                            |

|                                       |                                          |                                                                                                                                                                                                                                                                      |
|---------------------------------------|------------------------------------------|----------------------------------------------------------------------------------------------------------------------------------------------------------------------------------------------------------------------------------------------------------------------|
|                                       | Anemia                                   | <b>Iron Deficiency Anemia</b> ICD-9 280.0, 280.1, 280.8, 280.9<br><b>Other deficiency anemia</b> ICD-9 281.0, 281.1, 281.2, 281.3, 281.4, 281.8, 281.9<br><b>ICD-10-CA</b> D50.0, D50.1, D50.8, D50.9                                                                |
| <i>Vaccine-preventable conditions</i> | Diphtheria                               | <b>ICD-9 032</b><br><b>CD-10-CA</b> A36.0, A36.1, A36.2, A36.3 A36.8, A36.9                                                                                                                                                                                          |
|                                       | Hemophilus<br>Influenza type B           | <b>ICD-9</b> 320.0<br><b>ICD-10-CA</b> G00.0                                                                                                                                                                                                                         |
|                                       | Hepatitis A                              | <b>ICD-9</b> 070.0, 070.1<br><b>ICD-10-CA</b> B15.0, B15.9                                                                                                                                                                                                           |
|                                       | Hepatitis B                              | <b>ICD-9</b> 070.2, 070.3<br><b>ICD-10-CA</b> B16.0, B16.1, B16.2, B16.9                                                                                                                                                                                             |
|                                       | Influenza                                | <b>ICD-9</b> 487<br><b>ICD-10-CA</b> J10.0, J10.1, J10.8, J11.0, J11.1, J11.8                                                                                                                                                                                        |
|                                       | Measles                                  | <b>ICD-9</b> 055<br><b>ICD-10-CA</b> B05.0, B05.1, B05.2, B05.3, B05.4, B05.8, B05.9                                                                                                                                                                                 |
|                                       | Meningococcal<br>disease<br>(meningitis) | <b>ICD-9 036</b><br><b>ICD-10-CA</b> A39.0, A39.1, A39.2, A39.3, A39.4, A39.5, A39.8, A39.9                                                                                                                                                                          |
|                                       | Mumps                                    | <b>ICD-9</b> 072<br><b>ICD-10-CA</b> B26.0, B26.1, B26.2, B26.3, B26.8, B26.9                                                                                                                                                                                        |
|                                       | Pertussis                                | <b>ICD-9</b> 033<br><b>ICD-10-CA</b> A37.0, A37.1, A37.8, A37.9                                                                                                                                                                                                      |
|                                       | Pneumococcal                             | <b>ICD-9</b> 038.2, 041.2, 320.1, 481, 567.1, 711.0<br><b>ICD-10-CA</b> A40.3, G00.1, J13<br>Only counted 481 (ICD-9) and J13 (ICD-10) if COPD was not a secondary condition.                                                                                        |
|                                       | Poliomyelitis                            | <b>ICD-9</b> 045<br><b>ICD-10-CA</b> A80.0, A80.1, A80.2, A80.3, A80.4, A80.9                                                                                                                                                                                        |
|                                       | Pulmonary/other<br>tuberculosis          | <b>ICD-9</b> 011-018<br><b>ICD-10-CA</b> A15, A16, A17, A18, A19                                                                                                                                                                                                     |
|                                       | Rubella                                  | <b>ICD-9</b> 056<br><b>ICD-10-CA</b> B06.0, B06.8, B06.9                                                                                                                                                                                                             |
|                                       | Tetanus                                  | <b>ICD-9 037</b><br><b>ICD-10-CA A35</b>                                                                                                                                                                                                                             |
| <i>Acute Conditions</i>               | Dental Conditions                        | <b>ICD-9</b> 521, 522, 523, 525, 528<br><b>ICD-10-CA</b> K02, K03, K04, K05, K06, K08, K09.8, K09.9, K12, K13                                                                                                                                                        |
|                                       | Cellulitis                               | <b>ICD-9</b> 681, 682, 683, 686<br><b>ICD-10-CA</b> L03, L04, L08, L44.4, L88, L92.2, L98.0, L98.3<br>Excluding cases with the following surgical procedures **<br>CCI codes 1 1.RM.87, 1.RM.89, 1.RM.91, 5.CA.89.CK, 5.CA.89.DA, 5.CA.89.GB, 5.CA.89.WJ, 5.CA.89.WK |
|                                       | Pelvic<br>Inflammatory<br>Disease        | <b>ICD-9 614,</b><br><b>ICD-10-CA N70, N73, N99.4</b><br>Exclude males and cases with a hysterectomy procedures **: CCI codes: 1 1.RM.87, 1.RM.89, 1.RM.91,                                                                                                          |

|                                                                                                                                                                                                                    |                                                    |                                                                                                                                                                                     |
|--------------------------------------------------------------------------------------------------------------------------------------------------------------------------------------------------------------------|----------------------------------------------------|-------------------------------------------------------------------------------------------------------------------------------------------------------------------------------------|
|                                                                                                                                                                                                                    |                                                    | 5.CA.89.CK, 5.CA.89.DA, 5.CA.89.GB, 5.CA.89.WJ,<br>5.CA.89.WK                                                                                                                       |
|                                                                                                                                                                                                                    | Gastroenteritis &<br>Dehydration                   | <b>ICD-9</b> 558.9, 276.5<br><b>ICD-10-CA</b> K52.2, K52.8, K52.9, E86.0, E86.8                                                                                                     |
|                                                                                                                                                                                                                    | Severe Ear, Nose<br>and Throat (ENT)<br>infections | <b>ICD-9</b> 382, 462, 463, 465, 472.1<br><b>ICD-10-CA</b> H66, H67, J02, J03, J06, J31.2<br>Exclude otitis media cases with a myringotomy procedure**:<br>CCI codes: 1.DF.53.JA-TS |
| <p>* "Secondary diagnosis" refers to a diagnosis other than most responsible<br/> ** Code may be recorded in any position. Interventions coded as cancelled, previous and "abandoned after onset" are excluded</p> |                                                    |                                                                                                                                                                                     |
